# Supplementary material for: Ag–NiP deposited green carbon channel embedded NiP panels for sustainable water splitting
Source: Royal Society of Chemistry journal article supplement (doi:10.1039/d4ya00463a), 2024-01-01
Supplement: d4ya00463a1.pdf [file d4ya00463a1.pdf]

### Ag-NiP Deposited Green Carbon Channels Embedded NiP Panels for Sustainable Water Splitting

Revathy B. Nair<sup>a</sup>, A. Anantha Krishnan<sup>b</sup>, Aneesh Kumar M. A.<sup>b</sup>, Sivaraj Rajendran.<sup>b</sup>, Sreehari Harikumar<sup>b</sup>, Vidhya C.<sup>c</sup> M. Ameen Sha<sup>c</sup>, Thomas Mathew<sup>b</sup> Sajith Kurian<sup>a\*</sup>, P. S. Arun<sup>b\*</sup>

Table S1: Comparison of the Electrocatalytic Oxygen Evolution Reaction (OER) Activity of the Present System (Ag-CL/NiP) with Ni and Carbon-Based Catalysts Reported Recently

| Sl. No. | Name of the catalyst                                                   | OER over potential at 10 mA cm <sup>-2</sup> | Ref          |
|---------|------------------------------------------------------------------------|----------------------------------------------|--------------|
|         | Ag-C/Ni-P                                                              | 150mV                                        | Current Work |
| 1.      | Fe doped Ni <sub>3</sub> Fe/NiFe <sub>2</sub> O <sub>4</sub> /CNT      | 250mV                                        | [1]          |
| 2.      | Ni <sub>3</sub> Fe/NiFe <sub>2</sub> O <sub>4</sub> @N-GT              | 230mV                                        | [2]          |
| 3.      | NiO-NiFe <sub>2</sub> O <sub>4</sub> /rGO                              | 296mV                                        | [3]          |
| 4.      | Fe <sub>2</sub> O <sub>3</sub> /NiFe <sub>2</sub> O <sub>4</sub> @CNFs | 350mV                                        | [4]          |
| 5.      | Ni-NiFe <sub>2</sub> O <sub>4</sub> @C                                 | 212mV                                        | [5]          |
| 6.      | NiFe-LDH@CNT                                                           | 269mV                                        | [6]          |
| 7.      | N doped Graphene/NiFe <sub>2</sub> O <sub>4</sub>                      | 340mV                                        | [7]          |
| 8.      | NiFe <sub>2</sub> O <sub>4</sub> /Ketjenblack Carbon                   | 258mV                                        | [8]          |
| 9.      | Ni <sub>x</sub> Fe-S/NiFe <sub>2</sub> O <sub>4</sub> /3DCarbon        | 248mV                                        | [9]          |
| 10.     | Te-NiFe <sub>2</sub> O <sub>4</sub> @Carbon/NF                         | 220mV                                        | [10]         |

Table S2: Comparison of Photocatalytic Hydrogen Evolution Performance of the Present System (Ag-CL/NiP) with Recently Reported Catalysts

| Sl. No. | Name of catalyst                   | Hydrogen evolution rate                    | Photo current             | Ref          |
|---------|------------------------------------|--------------------------------------------|---------------------------|--------------|
|         | Ag-C/Ni-P                          | 4.37 mmolcm <sup>-2</sup> h <sup>-1</sup>  | 9.42 mA cm <sup>-2</sup>  | Current work |
| 1       | Cu <sub>x</sub> O/TiO <sub>2</sub> | 7.06 mmolh <sup>-1</sup> g <sup>-1</sup> . | 3.641 μA cm <sup>-2</sup> | [11]         |
| 2       | Ni <sub>2</sub> P/NiS@PCOS         | 150.7 μmolh <sup>-1</sup>                  | 155 μA cm <sup>-2</sup>   | [12]         |
| 3       | Et-GaAs/TiO <sub>2</sub> /Ni-P     | -                                          | 25 mA cm <sup>-2</sup>    | [13]         |
| 4       | CdS@Ni <sub>3</sub> S <sub>2</sub> | 178.1 μmolcm <sup>-2</sup> h <sup>-1</sup> | 10.8 mA cm <sup>-2</sup>  | [14]         |

|    |                                                                   |                                           |                          |      |
|----|-------------------------------------------------------------------|-------------------------------------------|--------------------------|------|
| 5  | WO <sub>3</sub> /CuO                                              | -                                         | 3.2 mA cm <sup>-2</sup>  | [15] |
| 6  | C-BiVO <sub>4</sub> /CQDs                                         | 50 μmolh <sup>-1</sup>                    | 4.83 mA cm <sup>-2</sup> | [16] |
| 7  | BaTiO <sub>3</sub>                                                | 6.72 μmolcm <sup>-2</sup> h <sup>-1</sup> | 0.17 mA cm <sup>-2</sup> | [17] |
| 8  | (Co-Ci/NiFeOOH/BiVO <sub>4</sub>                                  | 56.66 μmolh <sup>-1</sup>                 | 4.1 mA cm <sup>-2</sup>  | [18] |
| 9  | Ti-Fe <sub>2</sub> O <sub>3</sub> /In <sub>2</sub> O <sub>3</sub> | -                                         | 2 mA cm <sup>-2</sup>    | [19] |
| 10 | Co-Pi/CQDs/Fe <sub>2</sub> O <sub>3</sub> /TiO <sub>2</sub>       | -                                         | 3.0 mA cm <sup>-2</sup>  | [20] |

### 1. Physico - chemical characterization

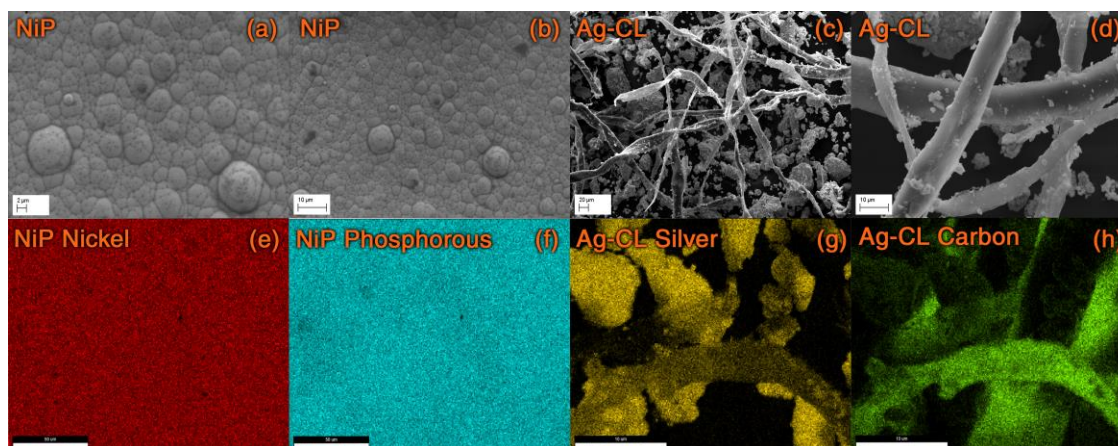

Figure S1: SEM images of (a – c) Ag-CL powder at different magnifications and EDAX mapping of (d- h) Ag-CL powder

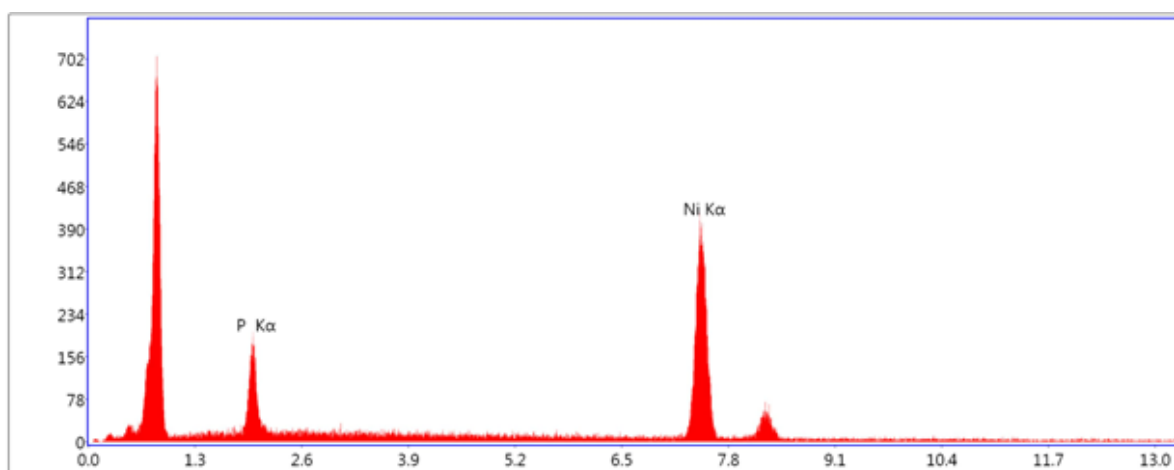

Figure S2: EDAX spectra of NiP panel

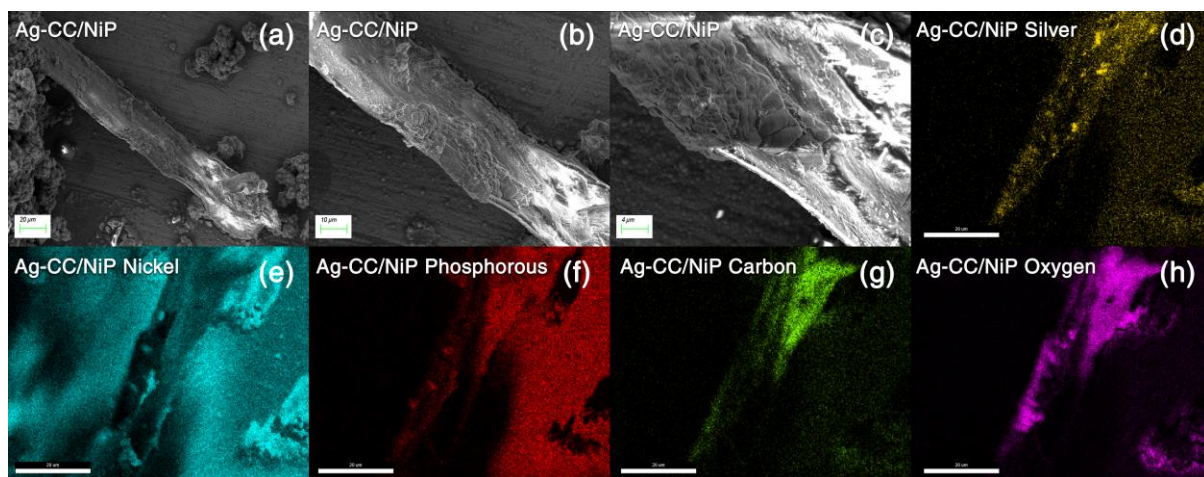

Figure S3: FE-SEM images of (a – c) Ag-CC/NiP at different magnifications and EDAX mapping of (d- h) Ag-CC/NiP panel

## 2. Electrocatalytic Oxygen Evolution Reaction (OER) Analysis

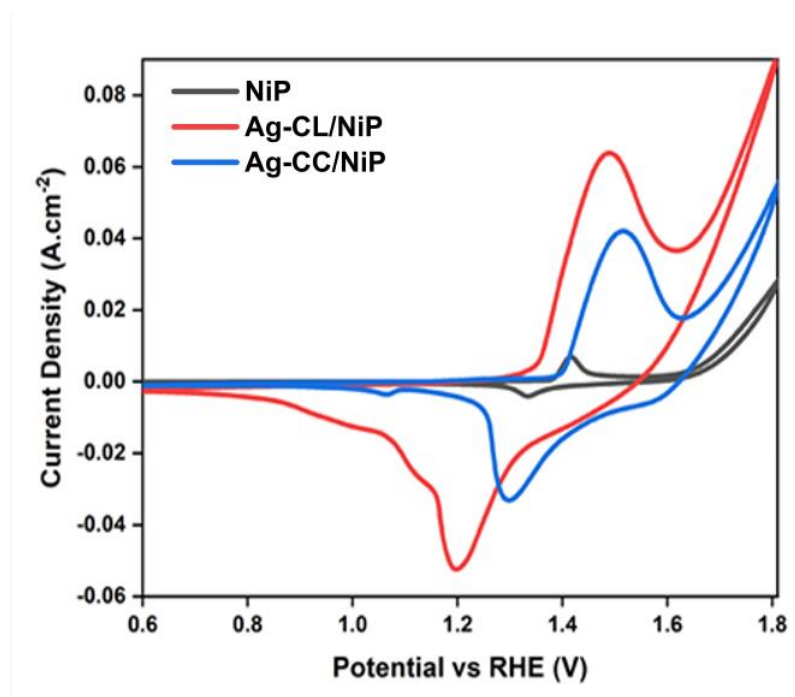

Figure S4: CV analysis of different electrodes at 10 mV/s scan rate in 1M NaOH electrolyte

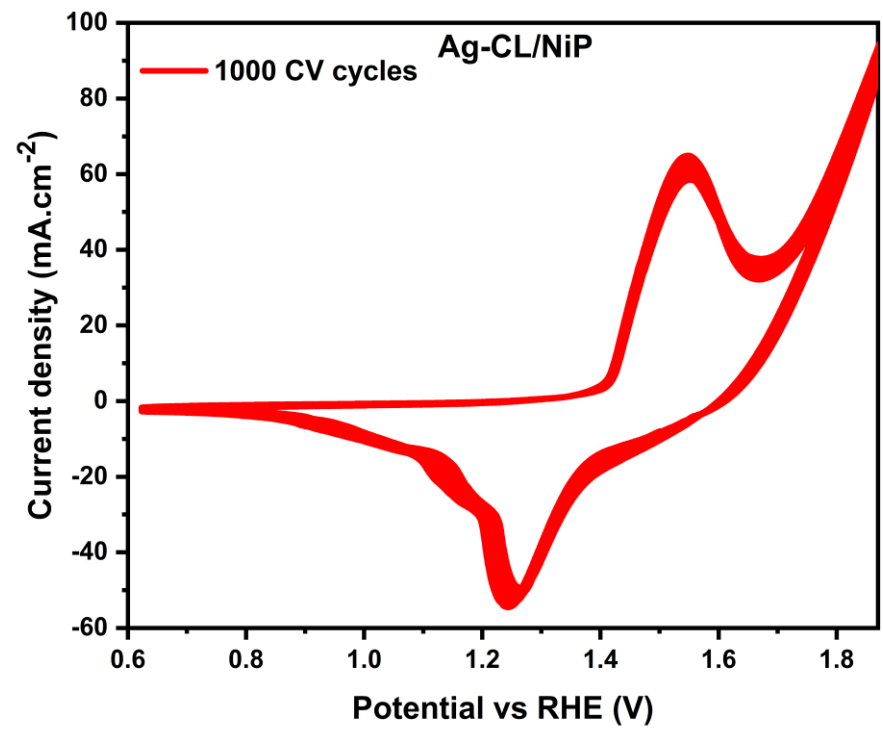

Figure S5: Stability analysis by 1000 cycles of CV at 10 mV/s scan rate in 1M NaOH electrolyte

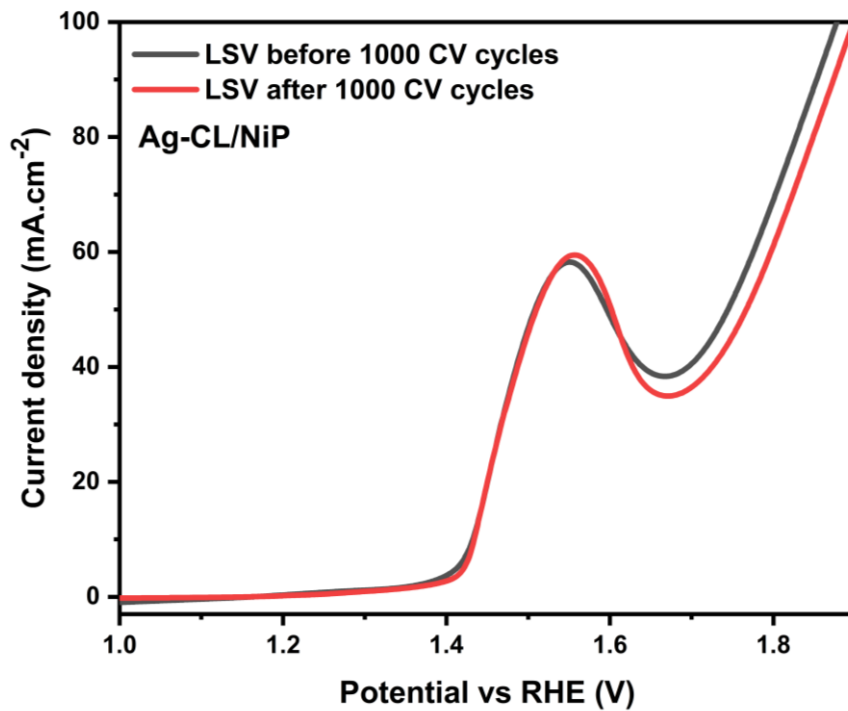

Figure S6: LSV curve before and after 1000 cycles of CV at 10 mV/s scan rate in 1M NaOH electrolyte

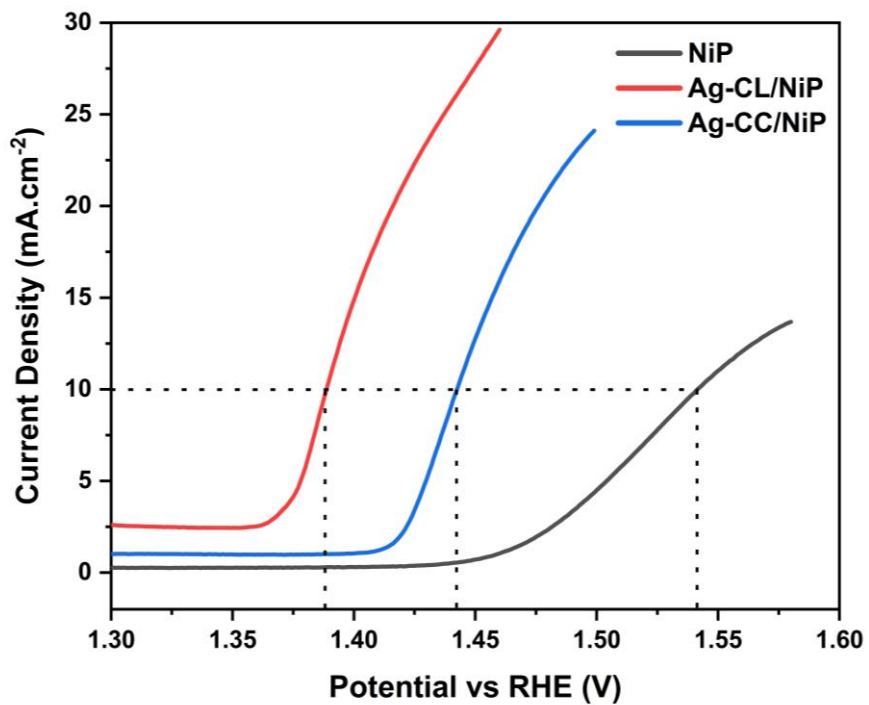

Figure S7: LSV curves at 10 mV/s scan rate in 1M NaOH electrolyte, evidenced initiation of electrocatalytic OER before 1.4 V vs RHE

### 3. Photocatalytic Water Splitting Analysis

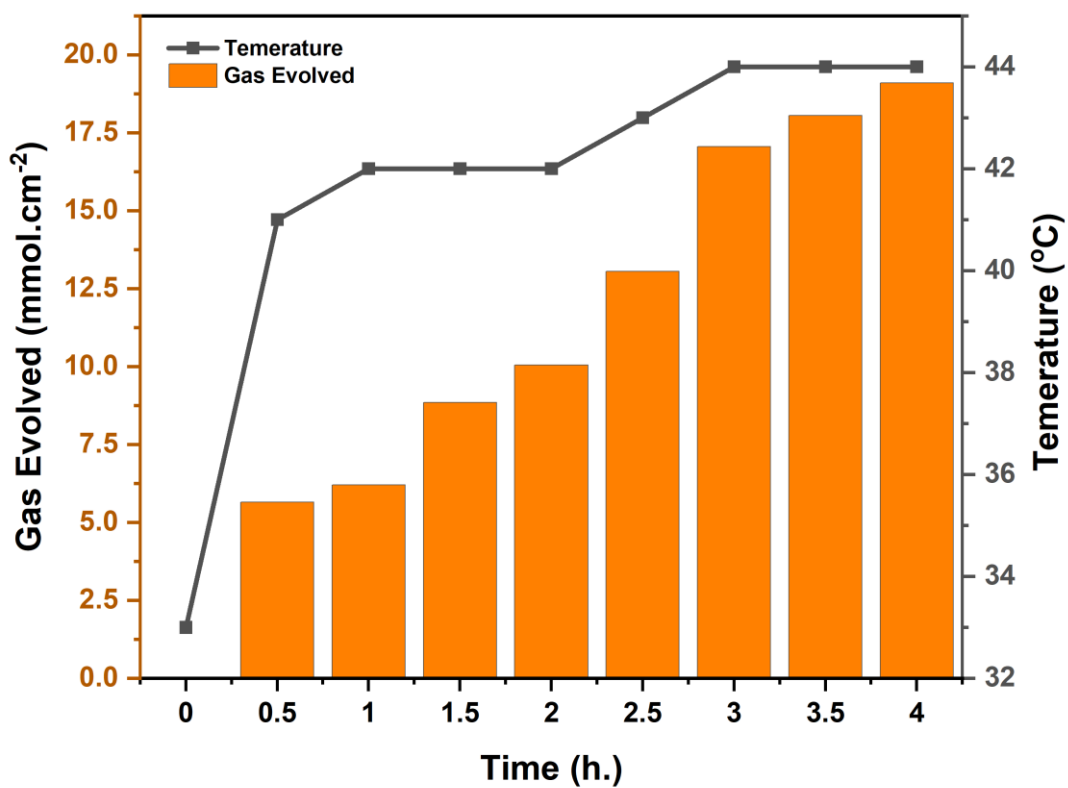

Figure S8: Variation in the hydrogen evolution performance with temperature fluctuations over time during photocatalytic water splitting of Ag-CL/NiP.

#### 4. Reusability and stability

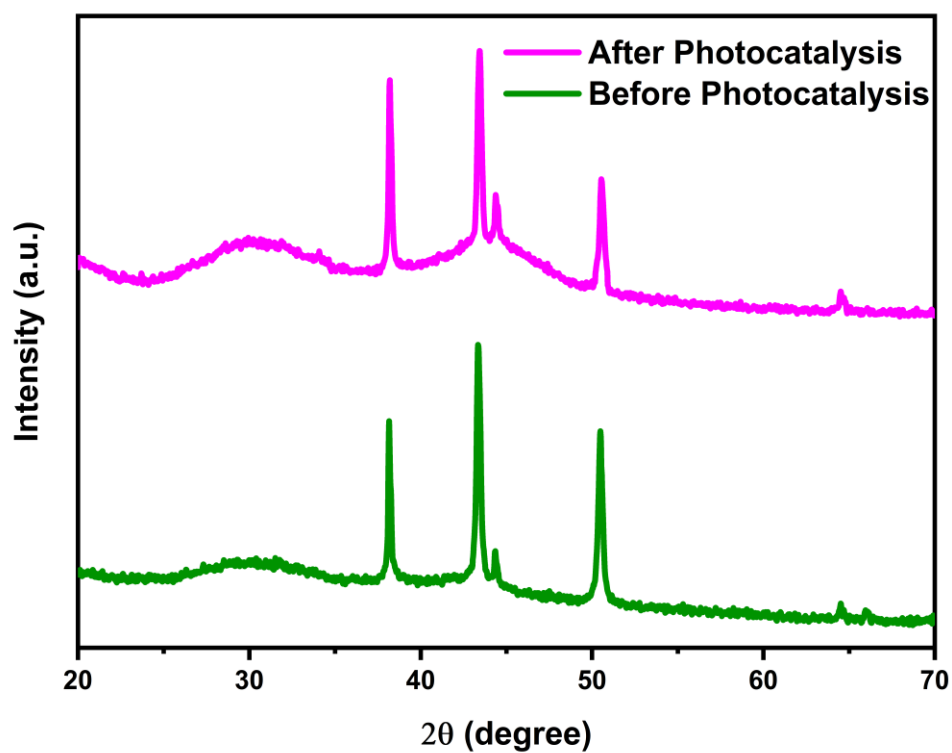

Figure S9 XRD pattern of Ag-CL/NiP before and after 5 cycles of photocatalytic water splitting

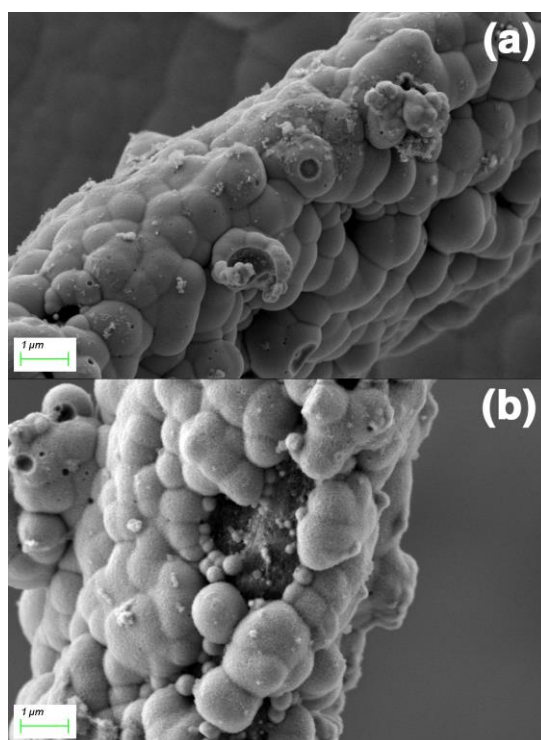

Figure S10 FESEM images of Ag-CL/NiP before and after 5 cycles of photocatalytic water splitting

## Apparent Quantum Yield

The apparent quantum yield (AQY) of Ag-CL/NiP catalysts was calculated by using the following equation SE1 given below,

$$\text{AQY (\%)} = (2 \times \text{no. of H}_2 \text{ molecules}) / (\text{Number of incident photons}) \times 100 \dots\dots\dots \text{SE1}^{21}$$

Under the assumption that field effect and multiple excitation has no contribution to H<sub>2</sub> generation.

For 9% photons from the wavelength range 370–500 nm are incident the no. of photons absorbed =  $8.084 \times 10^{18} \text{ s}^{-1}\text{cm}^{-2}$

$$\begin{aligned} \text{AQY (\%)} &= (2 \times \text{no. of H}_2 \text{ molecules}) / (\text{Number of incident photons}) \times 100 \\ &= 1.8 \times 10^{-2} \% \end{aligned}$$

The apparent quantum yield (AQY) of Ag-CL/NiP catalysts used for photocatalysis at ~12 °C

$$= 1.04 \times 10^{-2} \%$$

## References

- 1 K. Srinivas, Y. Chen, B. Wang, B. Yu, Y. Lu, Z. Su, W. Zhang and D. Yang, *ACS Appl. Mater. Interfaces*, 2020, **12**, 55782–55794.
- 2 J. Zou, G. Song, A. Cui and Z. Li, *Diam. Relat. Mater.*, 2024, **144**, 110999.
- 3 G. Zhang, Y. Li, Y. Zhou and F. Yang, *ChemElectroChem*, 2016, **3**, 1927–1936.
- 4 X. Meng, J. Xie, Y. Sun, J. Liu, B. Liu, R. Wang, F. Ma, M. Liu and J. Zou, *Int. J. Hydrogen Energy*, 2022, **47**, 21329–21343.
- 5 J. Zhang, Y. Jiang, Y. Wang, C. Yu, J. Cui, J. Wu, X. Shu, Y. Qin, J. Sun, J. Yan, H. Zheng, Y. Zhang and Y. Wu, *Electrochim. Acta*, 2019, **321**, 134652.
- 6 M. Shahid, *Mater. Sci. Eng. B*, 2024, **300**, 117143.
- 7 D. Navadeepthy, A. Rebekah, C. Viswanthan and N. Ponpandian, *Int. J. Hydrogen Energy*, 2021, **46**, 21512–21524.
- 8 C. Liu, X. Chen, X. Zhang, J. Li, B. Wang, Z. Luo, J. Li, D. Qian, J. Liu and G. I. N. Waterhouse, *J. Phys. Chem. Lett.*, 2023, **14**, 6099–6109.
- 9 W. Yan, J. Zhang, A. Lü, S. Lu, Y. Zhong and M. Wang, *Int. J. Miner. Metall. Mater.*, 2022, **29**, 1120–1131.
- 10 Y. Li, H. Guo, J. Zhao, Y. Zhang, L. Zhao and R. Song, *Chem. Eng. J.*, 2023, **464**, 142604.
- 11 S. Rajendran, S. S. Mani, T. R. Nivedhitha, A. K. Asoka, P. S. Arun, T. Mathew and C. S. Gopinath, *ACS Appl. Energy Mater.*, 2024, **7**, 104–116.
- 12 X. Yan, M. Xia, H. Liu, B. Zhang, C. Chang, L. Wang and G. Yang, *Nat. Commun.* 2023 *141*, 2023, **14**, 1–11.



- 13 M. Arunachalam, R. S. Kanase, K. Zhu and S. H. Kang, *Nat. Commun.* 2023 141, 2023, **14**, 1–11.
- 14 S. Yang, H. Guan, Y. Zhong, J. Quan, N. Luo, Q. Gao, Y. Xu, F. Peng, S. Zhang and Y. Fang, *Chem. Eng. J.*, 2021, **405**, 126231.
- 15 M. Sun, R. T. Gao, J. He, X. Liu, T. Nakajima, X. Zhang and L. Wang, *Angew. Chemie Int. Ed.*, 2021, **60**, 17601–17607.
- 16 Y. Wang, D. Chen, J. Zhang, M. S. Balogun, P. Wang, Y. Tong and Y. Huang, *Adv. Funct. Mater.*, 2022, **32**, 2112738.
- 17 S. Zhang, D. Chen, Z. Liu, M. Ruan and Z. Guo, *Appl. Catal. B Environ.*, 2021, **284**, 119686.
- 18 X. Hu, Y. Li, X. Wei, L. Wang, H. She, J. Huang and Q. Wang, *Adv. Powder Mater.*, 2022, **1**, 100024.
- 19 Y. Li, Q. Wu, Y. Chen, R. Zhang, C. Li, K. Zhang, M. Li, Y. Lin, D. Wang, X. Zou and T. Xie, *Appl. Catal. B Environ.*, 2021, **290**, 120058.
- 20 X. Hu, J. Huang, F. Zhao, P. Yi, B. He, Y. Wang, T. Chen, Y. Chen, Z. Li and X. Liu, *J. Mater. Chem. A*, 2020, **8**, 14915–14920.
- 21 S. S. Mani, S. Rajendran, N. Nalajala, T. Mathew and C. S. Gopinath, *Energy Technol.*, 2022, **10**, 1–12.
